# Supplementary material for: Elucidation of the preferred routes of C8-vinyl reduction in chlorophyll and bacteriochlorophyll biosynthesis
Source: PubMed Central journal article supplement (PMC4214422; doi:10.1042/bj20140163), 2014-08-22
Supplement: bj4620433add.pdf [file bj4620433add.pdf]

**SUPPLEMENTARY ONLINE DATA**

**Elucidation of the preferred routes of C8-vinyl reduction in chlorophyll and bacteriochlorophyll biosynthesis**

Daniel P. CANNIFFE\*<sup>1</sup>, Jack W. CHIDGEY\* and C. Neil HUNTER\*

\*Department of Molecular Biology and Biotechnology, University of Sheffield, Firth Court, Western Bank, Sheffield S10 2TN, U.K.

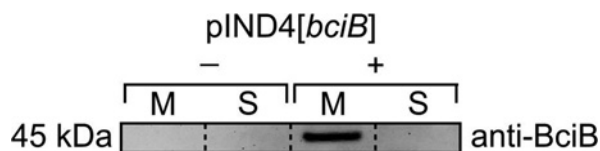

**Figure S1** Expression of recombinant *bciB* in *R. sphaeroides* detected by Western blotting

Separated membrane (M) and soluble (S) fractions of  $\Delta bchCXF/\Delta bciA$  lacking (-) and containing (+) pIND4[*bciB*] grown under expression-inducing conditions were separated by SDS/PAGE and transferred to a membrane that was probed with an anti-BciB antibody.

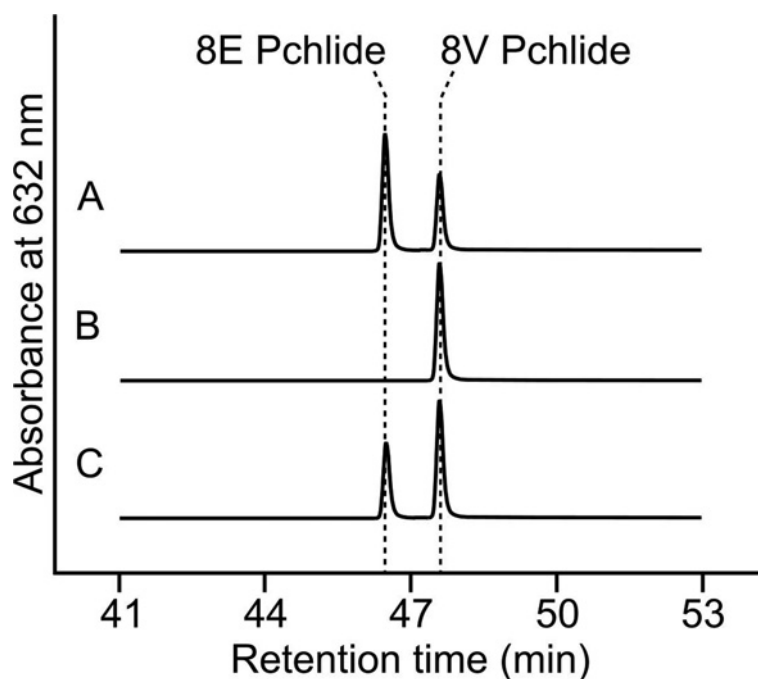

**Figure S2** HPLC elution profiles of pigments extracted from *Synechocystis* strains lacking *chlB*

HPLC elution profiles of extracts from pellets of (A)  $\Delta chlB$ , (B)  $\Delta bciB/\Delta chlB$  and (C)  $\Delta chlB/\Delta bciB::bciA^{RS}$  strains after 16 h growth without illumination. Traces are normalized to major peak height for clarity.

<sup>1</sup> To whom correspondence should be addressed (email d.canniffe@sheffield.ac.uk).

**Table S1** List of strains and plasmids described in the present study

| Strain/plasmid                                          | Properties                                                                                              | Source            |
|---------------------------------------------------------|---------------------------------------------------------------------------------------------------------|-------------------|
| <i>E. coli</i>                                          |                                                                                                         |                   |
| JM109                                                   | Cloning strain for pK18 <i>mobsacB</i> and pIND4 constructs                                             | Promega           |
| S17-1                                                   | Conjugative strain for pK18 <i>mobsacB</i> and pIND4 constructs                                         | [1]               |
| <i>R. sphaeroides</i>                                   |                                                                                                         |                   |
| WT                                                      | 2.4.1                                                                                                   | S. Kaplan*        |
| V3                                                      | Unmapped mutant in a DPOR subunit-encoding gene                                                         | [2]               |
| V3::bciB <sup>Sym</sup>                                 | V3 harbouring pIND4[ <i>bciB</i> ]                                                                      | The present study |
| V3/Δ <i>bciA</i> V3/Δ <i>bciA</i> ::bciB <sup>Sym</sup> | Unmarked deletion mutant of <i>rsp_3070</i> in V3 V3/Δ <i>bciA</i> harbouring pIND4[ <i>bciB</i> ]      | The present study |
| Δ <i>bchCXF</i>                                         | Unmarked deletion mutant of <i>bchC</i> , <i>bchX</i> and <i>bchF</i> in WT                             | The present study |
| Δ <i>bchCXF</i> /Δ <i>bciA</i>                          | Unmarked deletion mutant of <i>rsp_3070</i> in Δ <i>bchCXF</i>                                          | The present study |
| Δ <i>bchCXF</i> ::bciB <sup>Sym</sup>                   | Δ <i>bchCXF</i> harbouring pIND4[ <i>bciB</i> ]                                                         | The present study |
| Δ <i>bchCXF</i> /Δ <i>bciA</i> ::bciB <sup>Sym</sup>    | Δ <i>bchCXF</i> /Δ <i>bciA</i> harbouring pIND4[ <i>bciB</i> ]                                          | The present study |
| <i>Synechocystis</i>                                    |                                                                                                         |                   |
| WT                                                      | sp. PCC6803                                                                                             | R. Sobotka†       |
| Δ <i>bciB</i>                                           | <i>Emr<sup>R</sup></i> replacement of central portion of <i>slr1923</i> in WT                           | [3]               |
| Δ <i>bciB</i> ::bciA <sup>Rs</sup>                      | <i>rsp_3070</i> and <i>Kar<sup>R</sup></i> replacement of <i>psbAII</i> in Δ <i>bciB</i>                | [3]               |
| Δ <i>chlB</i>                                           | <i>Zeo<sup>R</sup></i> replacement of central portion of <i>slr0772</i> in WT                           | The present study |
| Δ <i>bciB</i> /Δ <i>chlB</i>                            | <i>Zeo<sup>R</sup></i> replacement of central portion of <i>slr0772</i> in Δ <i>bciB</i>                | The present study |
| Δ <i>bciB</i> /Δ <i>chlB</i> ::bciA <sup>Rs</sup>       | <i>Zeo<sup>R</sup></i> replacement of central portion of <i>slr0772</i> in Δ <i>bciB</i> :: <i>bciA</i> | The present study |
| Plasmid                                                 |                                                                                                         |                   |
| pK18 <i>mobsacB</i>                                     | Allelic exchange vector, <i>Km<sup>R</sup></i>                                                          | J. Armitage‡      |
| pIND4                                                   | IPTG-inducible expression vector for <i>R. sphaeroides</i> , <i>Km<sup>R</sup></i>                      | [4]               |
| pIND4[ <i>bciB</i> ]                                    | <i>slr1923</i> cloned into the BamHI/HindIII sites of pIND4                                             | The present study |

\*Department of Microbiology and Molecular Genetics, The University of Texas Medical School, Houston, TX 77030, U.S.A.

†Institute of Microbiology, Department of Phototrophic Microorganisms, Opatovický mlyn, 379 81 Trebon, Czech Republic

‡Department of Biochemistry, University of Oxford, South Parks Road, Oxford OX1 3QU, U.K.

**Table S2 List of primers used in the present study**

Restriction enzyme cleavage sites used for cloning are underlined in the primer sequence.

| Primer             | Sequence (5'→3')                                   | Cleavage site |
|--------------------|----------------------------------------------------|---------------|
| rsp_3070UpF        | CCGGAATT <u>CGGACATC</u> CTGACCGGTTTCCTGTCC        | EcoRI         |
| rsp_3070UpR        | GCTCTAGAGGACATGGCGGA <u>ACTCCTCGGG</u>             | XbaI          |
| rsp_3070DownF      | GCTCTAGACGTTGACATTGGTGCCGGTCCGG                    | XbaI          |
| rsp_3070DownR      | CCCAAGCTTCGAAGGCGATGCGCGGAGGC                      | HindIII       |
| rsp_3070CheckF     | GACGACGAGAAGCTGGCCTACGG                            |               |
| rsp_3070CheckR     | GGCAGGTACCGGAGAGCGGTTAGG                           |               |
| bchCXUpF           | CCGGAATT <u>CGCTC</u> TCGACCGGGTGC                 | EcoRI         |
| bchCXUpR           | GCGCTCTAGAAAGCGTTTTCCCGCGCTCTTC                    | XbaI          |
| bchCXDownF         | GCGCTCTAGATCTCGATACCTCGCGCGGC                      | XbaI          |
| bchCXDownR         | CCCAAGCTTGTCTCGAACAGCTTGCCCGTG                     | HindIII       |
| bchCXCheckF        | GACGATCCACTGCCGCTCGG                               |               |
| bchCXCheckR        | CAGCGGCACGCCGAGGCGG                                |               |
| bchFUpF            | CCGGAATTC <u>CCCGCCTGTCTCT</u> GCAAGCC             | EcoRI         |
| bchFUpR            | CGGGGGCGGAAGGTCAAGGCTCATCTTGAGTTCCGCTTCCGAGGAGGGCC |               |
| bchFDownF          | CCTACGTATCAACGCCGGGAGTTCC                          |               |
| bchFDownR          | CCCAAGCTTGGCGCGAGAGCGCTCGGCCCGCCGG                 | HindIII       |
| bchFCheckF         | GACGGCCACCGGGCCCTC                                 |               |
| bchFCheckR         | GAGGCGAGGCAGGCATCCTC                               |               |
| 1923INDF           | CGGGATCCACCGTTCTGCCCCCACC                          | BamHI         |
| 1923INDR           | CCCAAGCTTTATTGCTGGGGAAGTTATACTGC                   | HindIII       |
| chlBUpF            | GCATCGCTTATTGTTCTCAACG                             |               |
| chlBUpR            | ACATTAATTGCGTTGCGCTCACTGCGGTGATAATGGCGTGGACG       |               |
| chlBDownF          | CAACTAATCGCCTTGACGACATGCAGAATTGAATAAAGTCCAGGG      |               |
| chlBDownR          | CCTTCAAAGGCCATCACCC                                |               |
| zeo <sup>R</sup> F | TGACCAGCGCGTTCCGGTG                                |               |
| zeo <sup>R</sup> R | CGGGTCGCGCAGGGCGAAC                                |               |

**REFERENCES**

- Simon, R., Priefer, U. and Pühler, A. (1983) A broad host range mobilization system for *in vivo* genetic engineering: transposon mutagenesis in Gram negative bacteria. *Nat. Biotechnol.* **1**, 784–791 [CrossRef](#)
- Nasrulhaq-Boyce, A., Griffiths, W. T. and Jones, O. T. G. (1987) The use of continuous assays to characterize the oxidative cyclase that synthesizes the chlorophyll isocyclic ring. *Biochem. J.* **243**, 23–29 [PubMed](#)
- Canniffe, D. P., Jackson, P. J., Hollingshead, S., Dickman, M. J. and Hunter, C. N. (2013) Identification of an 8-vinyl reductase involved in bacteriochlorophyll biosynthesis in *Rhodobacter sphaeroides* and evidence for the existence of a third distinct class of the enzyme. *Biochem. J.* **450**, 397–405 [CrossRef](#) [PubMed](#)
- Ind, A. C., Porter, S. L., Brown, M. T., Byles, E. D., de Beyer, J. A., Godfrey, S. A. and Armitage, J. P. (2009) Inducible-expression plasmid for *Rhodobacter sphaeroides* and *Paracoccus denitrificans*. *Appl. Environ. Microbiol.* **75**, 6613–6615 [CrossRef](#) [PubMed](#)

Received 4 February 2014/2 June 2014; accepted 19 June 2014

Published as BJ Immediate Publication 19 June 2014, doi:10.1042/BJ20140163
